# Supplementary material for: Prevalence, New Incidence, Course, and Risk Factors of PTSD, Depression, Anxiety, and Panic Disorder during the Covid-19 Pandemic in 11 Countries
Source: MDPI journal article supplement (doi:10.3390/healthcare9060664), 2021-06-03
Supplement: s1 [file s1]

**Table S1. Type and number of containment measures implemented by countries, marked with 'X'**

| Type of containment measure                                                                                                                               | England          | Nether-lands | Finland | Sweden | Bulgaria | Romania     | Poland | Czech Republic | Latvia | India                            |
|-----------------------------------------------------------------------------------------------------------------------------------------------------------|------------------|--------------|---------|--------|----------|-------------|--------|----------------|--------|----------------------------------|
| <i>Hygienic and health measures</i>                                                                                                                       |                  |              |         |        |          |             |        |                |        |                                  |
| 1. Recommendation on washing hands more frequently                                                                                                        | X                | X            | X       | X      | X        | X           | X      | X              | X      | X                                |
| 2. Keeping respiratory hygiene by mandatory wearing a mask in public places                                                                               |                  |              |         |        | X        | X           | X      | X              |        | X                                |
| 3. Mandatory testing of all suspected cases*                                                                                                              |                  |              |         |        |          |             | X      |                |        |                                  |
| 4. Recommendation on coughing or sneezing into your elbow                                                                                                 | X                | X            | X       | X      | X        | X           | X      |                | X      |                                  |
| 5. Recommendation on NOT shaking hands                                                                                                                    | X                | X            | X       | X      | X        | X           | X      | X              | X      | X                                |
| 6. Mandatory reporting symptoms of illness to health authorities                                                                                          |                  | X            |         |        |          |             | X      |                | X      | X                                |
| 7. Enhanced cleaning and disinfection procedures                                                                                                          |                  | X            | X       | X      | X        | X           | X      | X              | X      |                                  |
| <i>Social-distancing measures</i>                                                                                                                         |                  |              |         |        |          |             |        |                |        |                                  |
| 8. Cancellation of all mass gatherings and events (cultural, sport, scientific or religious)                                                              | X                | X            | X       | X      | X        | X           | X      | X              | X      | X                                |
| 9. Funerals and weddings are forbidden, or the number of attendees is restricted                                                                          | X                | X            | X       | X      | X        | X           | X      | X              | X      | >20                              |
| 10. Closure of preschools, nurseries, and primary schools                                                                                                 | X                | X            |         |        | X        | X           | X      | X              | X      | X                                |
| 11. Closure of secondary schools, colleges and universities                                                                                               | X                | X            | X       | X      | X        | X           | X      | X              | X      | X                                |
| 12. Final exams are cancelled or postponed                                                                                                                | X                |              |         |        | X        |             | X      |                | X      | X                                |
| 13. Recommendation on not using public transportation (e.g. bus, trains, ships, etc.)                                                                     | X                | X            |         | X      | X        | X           |        | X              | X      | X                                |
| 14. Recommendation on working from home if possible                                                                                                       | X                | X            | X       | X      | X        | X           | X      |                | X      | X                                |
| 15. Keep at least 1-2 meters away from other people                                                                                                       | X                | X            | X       | X      | X        | X           | X      | X              | X      | X                                |
| 16. Mandatory stay-at-home, unless it is absolutely essential to leave the home                                                                           | X                |              |         |        | X        | X           | X      | X              |        | X                                |
| 17. Introducing market / shopping hours for vulnerable groups                                                                                             | X                |              |         | X      | X        | X           | X      |                |        | Given at door steps free of cost |
| 18. A ban on visiting national and nature parks and mountains                                                                                             | X                |              |         |        | X        | X           | X      |                |        | X                                |
| 19. Dissolution of the Parliament - National Assembly meets only on bills and acts related to the state of emergency                                      | Virtual meetings |              |         |        | X        |             |        |                |        | X                                |
| 20. Closure of pubs, cafes, restaurants, except for delivery and takeaway services.                                                                       | X                | X            | X       |        | X        | X           | X      | X              |        | X                                |
| 21. Closure of cinemas, theatres, opera, concert venues, libraries, museums, heritage sites, discos, gambling halls, sport indoor and outdoor facilities. | X                | X            | X       |        | X        | X           | X      | X              | X      | X                                |
| 22. Closure of non-essential shops and large shopping malls.                                                                                              | X                |              |         |        | X        | X           |        | X              |        | X                                |
| 23. Limited number of citizens are allowed to gather and visit open and closed public places.                                                             | X                |              |         |        | X        | More than 3 | X      |                | X      |                                  |
| 24. Closure of playgrounds                                                                                                                                | X                | X            |         |        | X        | X           | X      | X              | X      | X                                |
| 25. Closure of all hotels and tourist accommodation                                                                                                       | X                |              |         |        | X        | X           |        | X              |        | X                                |
| 26. Closure of the judiciary and courts                                                                                                                   |                  |              |         |        | X        |             | X      |                | X      | Virtual meeting                  |
| 27. Discontinued are all elective medical surgeries and procedures                                                                                        | X                | X            |         | X      | X        | X           | X      | X              | X      | X                                |

| Type of containment measure                                                                                                                                                                                                     | England   | Nether-lands | Finland   | Sweden    | Bulgaria  | Romania   | Poland    | Czech Republic | Latvia    | India     |
|---------------------------------------------------------------------------------------------------------------------------------------------------------------------------------------------------------------------------------|-----------|--------------|-----------|-----------|-----------|-----------|-----------|----------------|-----------|-----------|
| 28. Visits to housing services for the elderly and other at-risk groups are prohibited                                                                                                                                          |           | X            | X         | X         |           | X         |           |                | X         |           |
| 29. A curfew order                                                                                                                                                                                                              |           |              |           |           |           | X         |           |                |           | X         |
| 30. People are not allowed to receive guests in their home or the number of guests is restricted                                                                                                                                |           | X            |           |           |           | X         |           | X              | X         | X         |
| <i>Isolation of symptomatic individuals and quarantine</i>                                                                                                                                                                      |           |              |           |           |           |           |           |                |           |           |
| 31. Isolation of ill persons at home for certain period of time                                                                                                                                                                 | X         | X            | X         |           | X         | X         | X         | X              | X         |           |
| 32. Obligatory admission to a hospital of seriously ill persons                                                                                                                                                                 |           |              |           |           | X         | X         | X         | X              |           |           |
| 33. Placement in mandatory home quarantine of contacts                                                                                                                                                                          |           | X            | X         |           | X         | X         | X         |                | X         | X         |
| 34. Placement in mandatory home quarantine of citizens returning from abroad                                                                                                                                                    |           |              | X         |           | X         | X         | X         | X              | X         | X         |
| <i>Travel restrictions and border controls</i>                                                                                                                                                                                  |           |              |           |           |           |           |           |                |           |           |
| 35. Placement of cordon sanitaire on areas infected by a disease such as big cities (i.e. a guarded line preventing anyone from leaving the infected area)                                                                      |           |              |           |           | X         | X         |           |                |           | X         |
| 36. Using screening procedures such as asking travelers if they have symptoms of influenza; have had close contact with someone with influenza; performing a visual screen for signs of influenza or measuring body temperature |           | X            | X         |           | X         | X         | X         | X              | X         | X         |
| 37. Border closures: partial or total closure of a land border (e.g. to people from outside the EU)                                                                                                                             |           | X            | X         |           | X         | X         | X         | X              | X         | X         |
| 38. Flight suspensions: government bans on flights from or to the country                                                                                                                                                       |           | X            |           |           | X         | X         | X         | X              | X         | X         |
| 39. Present a health screening form when entering the country                                                                                                                                                                   |           | X            |           |           |           | X         |           | X              | X         | X         |
| 40. Citizens are not allowed to leave the country                                                                                                                                                                               |           |              | X         |           |           |           | X         |                |           | X         |
| <i>Surveillance measures</i>                                                                                                                                                                                                    |           |              |           |           |           |           |           |                |           |           |
| 41. Contact tracing assessment of Covid-19 transmission                                                                                                                                                                         |           | X            | X         |           | X         |           | X         | X              |           |           |
| 42. Police forces are allowed to request and obtain citizens' personal information from internet and telephone providers                                                                                                        |           |              |           |           | X         |           |           |                | X         |           |
| 43. Mass testing for Covid-19 (i.e. expanded targeted testing or random testing of the general population, irrespective of symptoms)                                                                                            |           | X            | X         |           |           |           |           |                |           |           |
| <i>Other measures</i>                                                                                                                                                                                                           |           |              |           |           |           |           |           |                |           |           |
| 44. Declaring state of emergency in the country                                                                                                                                                                                 |           |              | X         |           | X         | X         |           | X              | X         | X         |
| 45. Penalties or fines for non-compliance with covid-19 containment measures                                                                                                                                                    | X         | X            | X         |           | X         | X         | X         | X              | X         | X         |
| <b>Total number of measures: 45</b>                                                                                                                                                                                             | <b>24</b> | <b>27</b>    | <b>22</b> | <b>13</b> | <b>37</b> | <b>36</b> | <b>33</b> | <b>28</b>      | <b>30</b> | <b>35</b> |

\*Excluded because it was only used in 1 country

**Table S2. Survey questions reported in this study**

| Question                                                                                                                                                                                                                           | Answer                                                                                                                                                                                                                                    |
|------------------------------------------------------------------------------------------------------------------------------------------------------------------------------------------------------------------------------------|-------------------------------------------------------------------------------------------------------------------------------------------------------------------------------------------------------------------------------------------|
| 1. What is your gender?                                                                                                                                                                                                            | A. Female<br>B. Male<br>C. Other                                                                                                                                                                                                          |
| 2. In which country do you currently reside?                                                                                                                                                                                       | A. Belgium<br>B. Bulgaria<br>C. Czech Republic<br>D. United Kingdom<br>E. Finland<br>F. India<br>G. Latvia<br>H. Nederland<br>I. Poland<br>J. Romania<br>K. Sweden                                                                        |
| 3. Which year were you born?                                                                                                                                                                                                       |                                                                                                                                                                                                                                           |
| 4. What is the highest level of schooling you have completed or the highest degree you have received?                                                                                                                              | A. Primary school<br>B. High school<br>C. Professional qualification (not university)<br>D. College degree<br>E. Bachelor's degree<br>F. Master's degree<br>G. Doctoral degree                                                            |
| 5. Did you belong to the group of essential staff (e.g. medical staff, food preparation & serving workers, stock clerks and order fillers, etc.) or nonessential workers during the coronavirus outbreak?                          | A. Medical staff<br>B. Other essential staff<br>C. Nonessential staff                                                                                                                                                                     |
| 6. Have you lost your job or income due to the containment measures taken by your national government?                                                                                                                             | A. No, I did not<br>B. I lost my job<br>C. My working hours were reduced<br>D. I had to take unpaid leave<br>E. I was furloughed                                                                                                          |
| 7. Have you gotten a COVID-19 Pandemic Unemployment Payment or other types of financial compensation?                                                                                                                              | A. Yes<br>B. No                                                                                                                                                                                                                           |
| 8. Have you been infected and tested positive for the coronavirus?                                                                                                                                                                 | A. No<br>B. I have experienced COVID-19 symptoms, but I have not been tested<br>C. I have experienced COVID-19 symptoms and have been tested positive<br>D. I have been tested positive, but I have not experienced any COVID-19 symptoms |
| 9. Have any of your family members or close friends been infected with the coronavirus?                                                                                                                                            | A. No<br>B. Yes<br>C. Possibly                                                                                                                                                                                                            |
| 10. How much are you concerned that family members or close friends may get infected with the virus?                                                                                                                               | Measured on 11-point Likert scale from 0 (Not at all concerned) to 10 (Strongly concerned)                                                                                                                                                |
| 11. Have you been living alone or with relatives during the coronavirus outbreak?                                                                                                                                                  | A. Alone<br>B. With relatives / other people                                                                                                                                                                                              |
| 12. Have you experienced any significant stressful life event lately that is not directly related to the coronavirus outbreak?                                                                                                     | A. Yes<br>B. No                                                                                                                                                                                                                           |
| 13. Have you been diagnosed or experienced any symptoms of depression, anxiety, panic attacks or posttraumatic stress disorder before the coronavirus outbreak?                                                                    | A. No<br>B. Depression<br>C. Anxiety<br>D. Panic attacks<br>E. Posttraumatic stress disorder<br>F. Other mental illness                                                                                                                   |
| 14. Are you having any of the following health conditions: cardiovascular diseases, diabetes, hepatitis B, chronic obstructive pulmonary disease, chronic kidney disease, liver disease, cancer, morbid obesity, and hypertension? | A. Yes<br>B. No                                                                                                                                                                                                                           |
| 15. How many hours per day on average have you been engaged in following the news related to the coronavirus outbreak on TV, radio, newspapers or social media?                                                                    |                                                                                                                                                                                                                                           |

|                                                                                                                                                                                                                                                                                                                                                                                                                                                                                     |                                                                                                                                                                                                                                                                                                                                                                                                                                                                                                                                                                                                                                                                                                                                                                             |
|-------------------------------------------------------------------------------------------------------------------------------------------------------------------------------------------------------------------------------------------------------------------------------------------------------------------------------------------------------------------------------------------------------------------------------------------------------------------------------------|-----------------------------------------------------------------------------------------------------------------------------------------------------------------------------------------------------------------------------------------------------------------------------------------------------------------------------------------------------------------------------------------------------------------------------------------------------------------------------------------------------------------------------------------------------------------------------------------------------------------------------------------------------------------------------------------------------------------------------------------------------------------------------|
| 16. How much do you trust that the hospitals in your country have the resources and expertise to provide the best treatment available to people infected with the coronavirus?                                                                                                                                                                                                                                                                                                      | Measured on 11-point Likert scale from 0 (Strongly distrust) to 10 (Strongly trust)                                                                                                                                                                                                                                                                                                                                                                                                                                                                                                                                                                                                                                                                                         |
| 17. How much do you trust your national government to take care of its citizens?                                                                                                                                                                                                                                                                                                                                                                                                    | Measured on 11-point Likert scale from 0 (Strongly distrust) to 10 (Strongly trust)                                                                                                                                                                                                                                                                                                                                                                                                                                                                                                                                                                                                                                                                                         |
| 18. Do you think the reaction of your national government to the coronavirus outbreak has been appropriate, too extreme or not sufficient?                                                                                                                                                                                                                                                                                                                                          | Measured on 11-point Likert scale from 0 (Not at all sufficient), 5 (Reaction is appropriate) to 10 (Extremely stressful)                                                                                                                                                                                                                                                                                                                                                                                                                                                                                                                                                                                                                                                   |
| 19. How factually truthful do you think your national government has been about the coronavirus outbreak?                                                                                                                                                                                                                                                                                                                                                                           | Measured on 11-point Likert scale from 0 (Very untruthful) to 10 (Very truthful)                                                                                                                                                                                                                                                                                                                                                                                                                                                                                                                                                                                                                                                                                            |
| 20. How stressful have you found the crisis with the coronavirus outbreak?                                                                                                                                                                                                                                                                                                                                                                                                          | Measured on 11-point Likert scale from 0 (Not at all stressful) to 10 (Extremely stressful)                                                                                                                                                                                                                                                                                                                                                                                                                                                                                                                                                                                                                                                                                 |
| 21. During the past week were there any social situations (e.g. work, public transportation, movie, theaters, crowds, shopping malls) you avoided, or felt afraid of (uncomfortable in, wanted to avoid or leave), because of fear of getting infected by the coronavirus? Are there any other situations that you would have avoided or been afraid of if they had come up during the past week, for the same reason? Please rate your level of fear and avoidance this past week. | 1-None: no fear or avoidance; 2-Mild: occasional fear and/or avoidance but I could usually confront or endure the situation. There was little or no modification of my lifestyle due to this; 3-Moderate: noticeable fear and/or avoidance but still manageable. I avoided some situations, but I could confront them with a companion. There was some modification of my lifestyle because of this, but my overall functioning was not impaired; 4-Severe: extensive avoidance. Substantial modification of my lifestyle was required to accommodate the avoidance making it difficult to manage usual activities; 5-Extreme: pervasive disabling fear and/or avoidance. Extensive modification in my lifestyle was required such that important tasks were not performed. |
| 22. Has this measure been applied in your country?                                                                                                                                                                                                                                                                                                                                                                                                                                  | A. Yes, this measure has been applied in my country and affected me personally -> Go to Question 17 & 18<br>B. Yes, this measure has been applied in my country, but did not affect me personally -> Go to Question 19<br>C. No, this measure has not been applied in my country -> Go to next measure<br>D. I don't know -> Go to next measure                                                                                                                                                                                                                                                                                                                                                                                                                             |
| 23. To what extent have you followed this measure? Please try to be as honest as possible. Your answers will be kept confidential.                                                                                                                                                                                                                                                                                                                                                  | Measured on 11-point Likert scale from 0 (Not at all) to 10 (Strictly every day)                                                                                                                                                                                                                                                                                                                                                                                                                                                                                                                                                                                                                                                                                            |
| 24. To what extent has this measure caused you any discomfort or restricted your personal freedom and your fundamental human rights to engage in work, education, meet other people, move freely within the country or to visit other countries?                                                                                                                                                                                                                                    | Measured on 11-point Likert scale from 0 (Not at all restrictive) to 10 (Extremely restrictive)                                                                                                                                                                                                                                                                                                                                                                                                                                                                                                                                                                                                                                                                             |
| 25. How effective do you find this measure to prevent the spread of COVID-19 virus?                                                                                                                                                                                                                                                                                                                                                                                                 | Measured on 11-point Likert scale from 0 (Not at all effective) to 10 (Extremely effective)                                                                                                                                                                                                                                                                                                                                                                                                                                                                                                                                                                                                                                                                                 |
| 26. Would you like to participate in the follow-up assessments of this study by answering the questions above after a month?                                                                                                                                                                                                                                                                                                                                                        | A.Yes<br>B.No                                                                                                                                                                                                                                                                                                                                                                                                                                                                                                                                                                                                                                                                                                                                                               |

**Table S3. Demographics & variations across countries (% , mean)**

| Characteristics / Variables                                                                                                                           | UK<br>N=659 | Belgium<br>N=384 | Netherlands<br>N=867 | Bulgaria<br>N=1862 | Czech<br>Rep<br>N=725 | Finland<br>N=543 | India<br>N=780 | Latvia<br>N=635 | Poland<br>N=996 | Romania<br>N=1502 | Sweden<br>N=590 | Total<br>N=9543 |
|-------------------------------------------------------------------------------------------------------------------------------------------------------|-------------|------------------|----------------------|--------------------|-----------------------|------------------|----------------|-----------------|-----------------|-------------------|-----------------|-----------------|
| Female (%)                                                                                                                                            | 59.2        | 75.0             | 68.7                 | 80.2               | 85.4                  | 82.9             | 30.9           | 85.7            | 79.2            | 63.2              | 77.6            | 71.4            |
| Age (mean)                                                                                                                                            | 56.9        | 52.6             | 55.1                 | 43.4               | 40.9                  | 50.2             | 47.7           | 45.4            | 38.1            | 50.5              | 51.8            | 47.5            |
| Lower Education                                                                                                                                       | 18.5        | 24.2             | 15.0                 | 10.0               | 45.5                  | 18.2             | 4.2            | 8.3             | 26.0            | 19.0              | 2.9             | 16.8            |
| Professional Education                                                                                                                                | 39.8        | 22.9             | 68.7                 | 10.3               | 20.0                  | 55.1             | 13.5           | 20.9            | 4.8             | 9.3               | 34.2            | 23.2            |
| Higher Education (BA, MA, PhD) (%)                                                                                                                    | 41.7        | 52.9             | 16.3                 | 79.6               | 34.5                  | 26.7             | 82.3           | 70.8            | 69.2            | 71.7              | 62.9            | 60.0            |
| Medical Staff (%)                                                                                                                                     | 7.9         | 9.6              | 12.0                 | 4.3                | 31.3                  | 14.9             | 28.6           | 11.2            | 4.3             | 5.2               | 16.4            | 11.5            |
| Other Essential Staff (%)                                                                                                                             | 21.9        | 15.4             | 18.9                 | 6.3                | 10.8                  | 10.3             | 14.4           | 18.9            | 11.0            | 7.5               | 20.5            | 12.5            |
| Non-essential Staff (%)                                                                                                                               | 70.2        | 75.0             | 69.1                 | 89.4               | 57.9                  | 74.8             | 57.0           | 69.9            | 84.7            | 87.3              | 63.1            | 76.0            |
| Lost Job (%)                                                                                                                                          | 23.8        | 14.1             | 16.3                 | 35.1               | 23.5                  | 13.1             | 38.6           | 25.5            | 35.9            | 24.1              | 8.5             | 26.0            |
| Received Covid-19 Unemployment Compensation of Lost Job (%)                                                                                           | 35.0        | 53.7             | 29.1                 | 10.1               | 25.6                  | 36.6             | 9.0            | 19.1            | 16.8            | 14.6              | 26.0            | 17.9            |
| With Covid-19 symptoms and/or tested positive (%)                                                                                                     | 16.4        | 10.9             | 15.9                 | 7.0                | 8.1                   | 7.9              | 4.4            | 4.3             | 4.7             | 3.2               | 23.2            | 8.5             |
| Family Infected with Covid-19 (%)                                                                                                                     | 32.2        | 36.5             | 29.2                 | 16.3               | 14.3                  | 13.6             | 25.5           | 9.6             | 13.9            | 18.7              | 53.9            | 21.8            |
| Concerned Family (mean)                                                                                                                               | 4.4         | 4.9              | 3.1                  | 5.5                | 4.4                   | 6.4              | 5.9            | 5.5             | 4.4             | 5.6               | 6.6             | 5.1             |
| With Preexisting Mental Disorder (%)                                                                                                                  | 35.5        | 26.3             | 18.7                 | 33.1               | 23.6                  | 41.1             | 27.4           | 26.5            | 21.6            | 25.9              | 36.8            | 28.4            |
| With Major Life Event (%)                                                                                                                             | 30.2        | 31.0             | 26.4                 | 31.3               | 44.1                  | 37.4             | 42.8           | 48.5            | 44.4            | 38.9              | 31.5            | 36.8            |
| With Health Conditions (%)                                                                                                                            | 30.5        | 27.6             | 32.5                 | 23.2               | 27.7                  | 37.8             | 30.8           | 32.6            | 28.3            | 36.9              | 34.7            | 30.5            |
| Time News (mean in hours)                                                                                                                             | 1.8         | 1.7              | 2.1                  | 1.9                | 1.8                   | 1.3              | 2.1            | 1.2             | 1.5             | 2.2               | 1.5             | 1.8             |
| Trust Hospitals (mean): measured on 11-point Likert scale from 0 (Strongly distrust) to 10 (Strongly trust)                                           | 5.8         | 6.7              | 5.7                  | 3.3                | 6.6                   | 7.7              | 5.2            | 5.3             | 2.9             | 3.0               | 6.7             | 4.7             |
| Trust Government (mean): measured on 11-point Likert scale from 0 (Strongly distrust) to 10 (Strongly trust)                                          | 2.9         | 3.5              | 3.0                  | 2.1                | 3.1                   | 6.6              | 5.7            | 3.9             | 1.3             | 3.0               | 5.9             | 3.3             |
| Reaction Government (mean): measured on 11-point Likert scale from 0 (Not at all sufficient), 5 (Reaction is appropriate) to 10 (Extremely stressful) | 5.0         | 5.9              | 7.1                  | 5.8                | 6.2                   | 5.2              | 5.2            | 6.8             | 6.1             | 5.1               | 3.9             | 5.7             |
| Truthful Government (mean): measured on 11-point Likert scale from 0 (Very untruthful) to 10 (Very truthful)                                          | 2.6         | 5.9              | 6.9                  | 3.2                | 4.1                   | 6.2              | 5.5            | 4.9             | 1.7             | 3.7               | 6.3             | 4.2             |
| Stress Outbreak (mean): measured on 11-point Likert scale from 0 (Not at all stressful) to 10 (Extremely stressful)                                   | 6.2         | 6.7              | 5.9                  | 6.8                | 5.7                   | 6.2              | 6.4            | 5.6             | 6.1             | 7.7               | 6.0             | 6.5             |
| Fear of Infection (mean)                                                                                                                              | 1.9         | 2.0              | 1.6                  | 2.0                | 1.6                   | 2.0              | 2.3            | 1.7             | 1.9             | 2.0               | 2.5             | 1.9             |
| Average Effectiveness (mean)                                                                                                                          | 5.2         | 5.7              | 3.8                  | 5.7                | 5.8                   | 7.7              | 8.2            | 5.7             | 4.8             | 6.2               | 7.4             | 5.9             |
| Average Restrictiveness (mean)                                                                                                                        | 5.9         | 6.4              | 7.2                  | 5.8                | 6.6                   | 4.0              | 5.5            | 5.5             | 6.1             | 6.8               | 3.8             | 5.9             |
| Average Compliance (mean)                                                                                                                             | 7.5         | 8.1              | 6.2                  | 8.2                | 8.1                   | 8.7              | 8.8            | 7.9             | 7.3             | 8.3               | 8.6             | 8.0             |
| Number Measures                                                                                                                                       | 14          | 16               | 12                   | 18                 | 15                    | 12               | 21             | 15              | 16              | 13                | 8               | 15              |
| Exposure Time Measures (days)                                                                                                                         | 139         | 154              | 153                  | 150                | 145                   | 145              | 152            | 155             | 153             | 145               | 148             | 149             |

**Table S4. Prevalence and incidence of PTSD, anxiety, depression, and panic disorder per country**

| Country →                                 | UK<br>N=659               |                          | Belgium<br>N=384          |                          | Netherlands<br>N=867      |                          | Bulgaria<br>N=1862        |                          | Czech Rep<br>N=725        |                          | Finland<br>N=543          |                          | India<br>N=780            |                          | Latvia<br>N=635           |                          | Poland<br>N=996           |                          | Romania<br>N=1502         |                          | Sweden<br>N=590           |                          | Total<br>N=9543           |                          |
|-------------------------------------------|---------------------------|--------------------------|---------------------------|--------------------------|---------------------------|--------------------------|---------------------------|--------------------------|---------------------------|--------------------------|---------------------------|--------------------------|---------------------------|--------------------------|---------------------------|--------------------------|---------------------------|--------------------------|---------------------------|--------------------------|---------------------------|--------------------------|---------------------------|--------------------------|
| Mental disorder                           | Prevalence <sup>1</sup> % | Incidence <sup>2</sup> % |
| <b>Positive PTSD*</b>                     | 27.0                      | 9.1                      | 37.0                      | 16.9                     | 25.1                      | 10.8                     | 33.4                      | 12.9                     | 39.0                      | 13.9                     | 20.6                      | 5.0                      | 40.8                      | 11.4                     | 25.7                      | 7.4                      | 31.4                      | 11.2                     | 38.0                      | 13.1                     | 29.5                      | 9.7                      | 32.4                      | 11.4                     |
| <b>Positive GAD*</b>                      | 28.4                      | 5.8                      | 35.2                      | 14.1                     | 27.2                      | 11.4                     | 25.0                      | 7.8                      | 31.3                      | 9.1                      | 25.8                      | 6.4                      | 31.9                      | 7.7                      | 25.8                      | 5.5                      | 34.8                      | 10.6                     | 28.2                      | 8.3                      | 25.6                      | 6.1                      | 28.6                      | 8.4                      |
| <b>Positive Depression*</b>               | 33.4                      | 9.3                      | 33.6                      | 14.1                     | 28.3                      | 13.3                     | 29.6                      | 9.7                      | 31.3                      | 8.0                      | 25.8                      | 5.2                      | 31.9                      | 7.8                      | 26.9                      | 5.5                      | 40.2                      | 13.7                     | 26.8                      | 8.0                      | 27.1                      | 7.3                      | 30.3                      | 9.3                      |
| <b>Positive Panic disorder*</b>           | 13.7                      | 2.1                      | 14.8                      | 4.4                      | 10.5                      | 2.9                      | 10.8                      | 2.7                      | 16.1                      | 3.0                      | 12.0                      | 1.7                      | 18.8                      | 3.8                      | 12.1                      | 2.0                      | 17.8                      | 5.8                      | 11.9                      | 2.2                      | 12.4                      | 2.0                      | 13.7                      | 3.0                      |
| <b>Positive for all disorders</b>         | 7.1                       | 0.9                      | 8.3                       | 1.6                      | 7.2                       | 1.8                      | 6.0                       | 1.8                      | 8.7                       | 1.2                      | 4.6                       | 0.4                      | 10.5                      | 1.3                      | 5.5                       | 1.3                      | 10.8                      | 3.0                      | 6.6                       | 1.1                      | 6.1                       | 0.8                      | 7.3                       | 1.5                      |
| <b>Positive for at least one disorder</b> | 48.4                      | 14.9                     | 57.3                      | 26.3                     | 43.0                      | 20.6                     | 48.6                      | 17.9                     | 56.1                      | 19.6                     | 42.4                      | 11.4                     | 54.4                      | 16.8                     | 45.0                      | 12.0                     | 53.3                      | 18.4                     | 51.8                      | 18.7                     | 44.2                      | 13.2                     | 48.6                      | 17.4                     |

\*(score  $\geq 3$ ); <sup>1</sup> Prevalence calculated for all respondents (N=9543); <sup>2</sup> Incidence calculated for respondents without any diagnosis or symptoms of mental illness before the pandemic & no experience of major stressful life event not directly related to the pandemic, compared to all respondents.

**Table S5. Course of PTSD, anxiety, depression, and panic disorder**

| Type of mental disorder                   | 1st assessment                   |                                                                                         |                                                                                      | 1st & 2nd assessment                                                                                |                                        |               |                                                                                                  |                                        |               |                                                                                                         |                                        |               |
|-------------------------------------------|----------------------------------|-----------------------------------------------------------------------------------------|--------------------------------------------------------------------------------------|-----------------------------------------------------------------------------------------------------|----------------------------------------|---------------|--------------------------------------------------------------------------------------------------|----------------------------------------|---------------|---------------------------------------------------------------------------------------------------------|----------------------------------------|---------------|
|                                           | All respondents<br>N=9543<br>(%) | Without preexisting mental illness & no experience of major life event<br>N=4699<br>(%) | With preexisting mental illness & no experience of major life event<br>N=1336<br>(%) | Without preexisting mental illness & no experience of major life event during the pandemic<br>N=909 |                                        |               | With preexisting mental illness & no experience of major life event during the pandemic<br>N=301 |                                        |               | With preexisting mental illness & experience of major stressful life event during the pandemic<br>N=314 |                                        |               |
|                                           |                                  |                                                                                         |                                                                                      | 1 <sup>st</sup> assessment<br>(%)<br>A                                                              | 2 <sup>nd</sup> assessment<br>(%)<br>A | P-value       | 1 <sup>st</sup> assessment<br>(%)<br>B                                                           | 2 <sup>nd</sup> assessment<br>(%)<br>B | P-value       | 1 <sup>st</sup> assessment<br>(%)<br>C                                                                  | 2 <sup>nd</sup> assessment<br>(%)<br>C | P-value       |
| <b>Positive PTSD</b>                      | 32.4                             | 23.2                                                                                    | 39.7                                                                                 | 23.8                                                                                                | 20.2                                   | <b>0.008*</b> | 37.9                                                                                             | 33.2                                   | 0.118         | 53.5                                                                                                    | 49.4                                   | 0.128         |
| <b>Positive GAD</b>                       | 28.6                             | 17.0                                                                                    | 37.4                                                                                 | 16.7                                                                                                | 20.0                                   | <b>0.016*</b> | 36.9                                                                                             | 42.9                                   | <b>0.047*</b> | 52.9                                                                                                    | 59.2                                   | <b>0.043*</b> |
| <b>Positive Depression</b>                | 30.3                             | 19.0                                                                                    | 41.5                                                                                 | 17.7                                                                                                | 20.0                                   | 0.096         | 41.5                                                                                             | 42.2                                   | 0.809         | 54.8                                                                                                    | 53.2                                   | 0.593         |
| <b>Positive Panic disorder</b>            | 13.3                             | 6.0                                                                                     | 21.5                                                                                 | 5.5                                                                                                 | 6.8                                    | 0.101         | 21.6                                                                                             | 20.9                                   | 0.793         | 35.4                                                                                                    | 35.7                                   | 0.730         |
| <b>Positive for all disorders</b>         | 7.3                              | 3.0                                                                                     | 10.8                                                                                 | 3.0                                                                                                 | 3.9                                    | 0.160         | 11.6                                                                                             | 11.3                                   | 0.858         | 19.7                                                                                                    | 20.1                                   | 0.681         |
| <b>Positive for at least one disorder</b> | 48.6                             | 35.4                                                                                    | 63.5                                                                                 | 35.9                                                                                                | 33.9                                   | 0.318         | 63.8                                                                                             | 62.1                                   | 0.579         | 76.4                                                                                                    | 76.8                                   | 0.891         |

\* Statistically significant difference between 1<sup>st</sup> and 2<sup>nd</sup> assessment.
